# Supplementary material for: Metallopolymer formation using the (1R,2R)-N,N′-bis(pyridylmethylene)cyclohexane-1,2-diamine (BPID) ligand class
Source: Royal Society of Chemistry journal article supplement (doi:10.1039/c3dt50327e), 2013-01-01
Supplement: c3dt50327e.pdf [file c3dt50327e.pdf]

## Supplementary Information

For

### **Metallopolymer Formation Using the (1*R*,2*R*)-*N,N'*- Bis(pyridylmethylene)cyclohexane-1,2-diamine (BPID) Ligand Class**

Kalyan V. Vasudevan, Nathan C. Smythe, Brian L. Scott and  
John C. Gordon\*

#### **Contents**

1) Experimental Data

2) X-ray Data Tables

3) DFT Calculation Data Tables

## 1) Experimental Data

**General Procedures:** All syntheses and manipulations were carried out under argon inside a Vacuum Atmospheres glove box. Anhydrous solvents were purchased from either Sigma Aldrich or Acros and stored over 4 Å molecular sieves. KH was purchased from Sigma Aldrich and used without further purification. The 2-py-BPID<sup>1</sup> and 4-py-BPID<sup>2</sup> ligands were synthesized according to literature procedure. Elemental Analysis was performed by Midwest Microlab, LLC. NMR spectra were recorded at ambient temperature on a Bruker AV-400 spectrometer. X-ray diffraction data were collected by mounting crystals under Paratone on glass fiber loops on a Bruker Apex II system fitted with an Oxford nitrogen cryostream. Structure solution and refinement against F<sup>2</sup> were performed using SHELX97.

Preparation of [K(THF)<sub>3</sub>-(2-py-BPID)-K]<sub>n</sub> (**2**): A 20 mL scintillation vial was charged with 2-py-BPID ligand (50 mg, 0.171 mmol), KH (28 mg, 0.698 mmol) and THF (5 mL). The mixture was stirred at 50°C for 18 hr resulting in a dark blue solution. The solvent was removed in vacuo and the resulting dark solid dissolved in THF (1.5 mL) and filtered through a PTFE filter. Hexanes were diffused into the clear, dark blue solution and the vial covered with aluminum foil, resulting in a crop of dark, crystalline needles after 3 days. The solution was decanted and the crystals washed with hexanes (3 x 2 mL) and subsequently dried at ambient pressure and temperature. (Yield: 41 mg, 41%). Note: Multiple attempts at obtaining consistent EA data resulted in samples exhibiting varying degrees of loss of THF solvating ligands. Thus, the crystalline samples were dried in vacuo for 2 hours before submitting for EA. <sup>1</sup>H NMR (C<sub>6</sub>D<sub>6</sub>): δ 8.07 (d, 1H, py-H), 7.94 (d, 1H, py-H), 7.05 (m, 2H, py-H), 6.84 (d, 1H, py-H), 6.75 (m, 1H, py-H), 6.70 (s, 1H, C-H), 6.61 (m, 1H, py-H), 6.44 (m, 1H, py-H), 4.50 (s, 1H, C-H), 3.57 (s, 12H, THF), 2.46 (m, 2H, Cy-H), 2.01 (m, 2H, Cy-H), 1.41 (s, 12H, THF), 1.75-1.58 (m, 4H, Cy-H). <sup>13</sup>C{<sup>1</sup>H} NMR (THF-*d*<sub>8</sub>): 158.0, 151.4, 132.2, 129.2, 117.9, 104.3, 102.9, 28.1. Anal. calcd for C<sub>18</sub>H<sub>18</sub>N<sub>4</sub>K<sub>2</sub> [**2** - (THF)<sub>3</sub>]: C, 58.34 H, 5.44. Found: C, 58.82 H, 5.95.

Preparation of [K(THF)<sub>2</sub>-(4-py-BPID)-K(THF)]<sub>n</sub> (**4**): A 20 mL scintillation vial was charged with BPID ligand (50 mg, 0.171 mmol), KH (28 mg, 0.698 mmol) and THF (5 mL). The mixture was stirred at 50°C for 18 hr resulting in a dark green-blue solution. The solvent was

removed in vacuo and the resulting dark solid dissolved in THF (1.5 mL) and filtered through a PTFE filter. Hexanes were diffused into the resulting clear, dark solution and the vial covered with aluminum foil, resulting in a crop of dark crystals after 3 days. The solution was decanted and the crystals washed with hexanes (3 x 2 mL) and subsequently dried at ambient pressure and temperature. (Yield: 23 mg, 23%).  $^1\text{H}$  NMR (THF- $d_8$ ):  $\delta$  8.74-8.33 (m(b), 2H, py-*H*), 8.25 (d, 1H, py-*H*), 8.10-7.74 (m(b), 1H, py-*H*), 7.59-7.04 (m(b), 3H, py-*H*), 6.95 (d, 1H, py-*H*), 6.30 (s(b), 1H, C-*H*), 5.84 (s(b), 1H, C-*H*), 3.08-2.88 (m(b), 1H, Cy-*H*), 2.51 (m, 1H, Cy-*H*), 2.45-2.14 (m(b), 2H, Cy-*H*), 1.97 (m, 1H, Cy-*H*), 1.61 (m, 1H, Cy-*H*), 1.49-1.31 (m, 2H, Cy-*H*).

## References

- 1) B. Liu, M.-J. Zhang, J. Cui and J. Zhu, *Acta Cryst.*, **2006**, *E62*, o5359-o5360.
- 2) X.-J. Yuan, Y.-Z. Li, Y.-J. Liu, Y.-Q. Tian, X.-Z. You, *Acta Cryst., Sect. E: Struct. Rep. Online*, **2002**, *58*, o640-o641.

## 2) X-ray Data Tables

**Table 1.** Crystal data for **2** and **4**.

|                                         | <b>2</b>                                                                     | <b>4</b>                                                                     |
|-----------------------------------------|------------------------------------------------------------------------------|------------------------------------------------------------------------------|
| Empirical formula                       | C <sub>30</sub> H <sub>44</sub> N <sub>4</sub> O <sub>3</sub> K <sub>2</sub> | C <sub>30</sub> H <sub>44</sub> N <sub>4</sub> O <sub>3</sub> K <sub>2</sub> |
| <i>M</i>                                | 584.88                                                                       | 584.88                                                                       |
| <i>T</i> /K                             | 140(1)                                                                       | 140(1)                                                                       |
| Color                                   | Purple                                                                       | Purple                                                                       |
| Crystal system                          | Monoclinic                                                                   | Monoclinic                                                                   |
| Space group                             | P2 <sub>1</sub> /c                                                           | P2 <sub>1</sub> /n                                                           |
| <i>a</i> /Å                             | 7.3294(5)                                                                    | 16.101(3)                                                                    |
| <i>b</i> /Å                             | 17.2843(13)                                                                  | 10.5899(17)                                                                  |
| <i>c</i> /Å                             | 24.3967(18)                                                                  | 19.115(3)                                                                    |
| <i>β</i> /°                             | 98.320(1)                                                                    | 108.545(2)                                                                   |
| <i>U</i> /Å <sup>3</sup>                | 3058.1(4)                                                                    | 3090.0(9)                                                                    |
| <i>Z</i>                                | 4                                                                            | 4                                                                            |
| D <sub>c</sub> /Mg m <sup>-3</sup>      | 1.270                                                                        | 1.262                                                                        |
| μ/mm <sup>-1</sup>                      | 0.346                                                                        | 0.343                                                                        |
| Crystal size/mm                         | 0.16x0.14x0.06                                                               | 0.10x0.08x0.03                                                               |
| Reflections collected                   | 33850                                                                        | 30080                                                                        |
| R(int)                                  | 0.0628                                                                       | 0.0953                                                                       |
| Data/restraints/parameters              | 7121 / 0 / 352                                                               | 5881 / 0 / 352                                                               |
| Absorption correction                   | Semi-empirical                                                               | Semi-empirical                                                               |
| <i>R</i> 1 [ <i>I</i> > 2 ( <i>I</i> )] | 0.0416                                                                       | 0.0550                                                                       |
| <i>wR</i> 2 (all data)                  | 0.1240                                                                       | 0.1506                                                                       |
| Largest peak, hole / e Å <sup>-3</sup>  | 0.551, -0.477                                                                | 0.509, -0.663                                                                |

**Table 2.** Bond distances for **2** and **4**.

| <b>Bond</b> | <b>2 (Å)</b> | <b>4 (Å)</b> |
|-------------|--------------|--------------|
| C7-C12      | 1.454(2)     | 1.448(4)     |
| C7-N2       | 1.317(2)     | 1.328(4)     |
| C6-N2       | 1.348(2)     | 1.360(4)     |
| C12-N3      | 1.321(2)     | 1.326(4)     |
| C13-N3      | 1.352(2)     | 1.362(4)     |
| C5-C6       | 1.404(2)     | 1.400(4)     |
| C13-C14     | 1.399(2)     | 1.403(4)     |
| K1-O1       | 2.7696(11)   | 2.690(3)     |
| K1-O2       | 2.8111(12)   | 2.699(3)     |
| K1-O3       | 2.9094(12)   |              |
| K2-O1       | 2.7620(12)   |              |
| K2-O2       | 2.8027(12)   |              |
| K2-O3       | 2.8738(13)   | 2.632(3)     |
| K1-N1       | 2.9497(13)   |              |
| K1-N2       | 2.8231(13)   | 2.807(3)     |
| K1-N3       | 2.7938(13)   | 2.796(3)     |
| K1-N4       | 2.9450(14)   | 2.774(3)     |
| K2-N1       | 2.9626(13)   | 2.734(3)     |
| K2-N2       | 2.7722(13)   | 2.702(3)     |
| K2-N3       | 2.7632(13)   | 2.811(3)     |
| K2-N4       | 2.9812(14)   |              |

### 3) DFT Calculation Data Tables

Gas-phase DFT calculations on the  $K_2[2\text{-py-BPID}^*]$  fragment failed to satisfactorily reproduce the experimental structural parameters and attempts to account for solvent explicitly were also unsatisfactory as the extended structure is needed in order to stabilize the solvent positions. Thus, the solvent-K interaction was modeled implicitly using PCM<sup>3</sup> with parameters for THF. The initial coordinates for 2-py-BPID were obtained from the CSD (structure code MEQFEU) while the X-ray crystal structure reported herein was used to construct  $K_2[2\text{-py-BPID}^*]$ . Geometry optimizations were performed with the R-B3LYP-D functional<sup>4,5,6</sup> using Grimme's empirical dispersion correction<sup>7</sup> (see Tables X and Y for a comparison with the optimized structures obtained from B3LYP and wB97X-D<sup>8,9</sup>). The 6-31++G(d,p) basis set was used for all atoms except K, for which 6-31G(d) was used.<sup>10,11,12</sup> Frequency calculations were performed on all optimized structures and no imaginary frequencies were found. At the U-B3LYP level, the S=1 state was 16.5 kcal/mol higher in energy than the R-B3LYP S=0 state. Single point energies at the B3LYP-D geometries were also computed using the R-M06 functional<sup>13</sup> and the KTZVPP basis set of Ahlrichs and coworkers<sup>14,15</sup> and a triple zeta valence set with 3 d polarization functions for K.<sup>16</sup> All calculations were performed using the GAMESS-US software package.<sup>17</sup> MacMolPlt was used to generate the molecular orbital images.<sup>18</sup>

**Table 3.** HOMO-LUMO gaps from B3LYP-D and M06.

|             | 2-py-BPID |      | $K_2[2\text{-py-BPID}^*]$ |      |
|-------------|-----------|------|---------------------------|------|
|             | B3LYP-D   | M06  | B3LYP-D                   | M06  |
| Energy (eV) | 5.14      | 5.62 | 2.02                      | 1.69 |

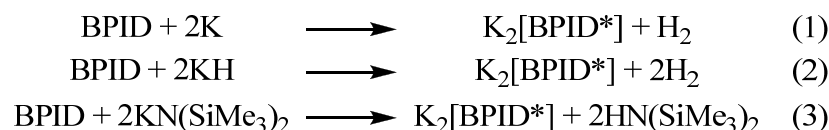

**Figure 1.** Equations used to calculate the reactions energies in table 1 in the main text.

**Table 4.** Experimental and calculated (B3LYP-D) bond lengths for 2-py-BPID.

| <b>Bond</b>    | <b>Expt (Å)</b> | <b>Calc (Å)</b> |
|----------------|-----------------|-----------------|
| <b>N1-C1</b>   | 1.466(2)        | 1.46            |
| <b>N1-C7</b>   | 1.267(2)        | 1.27            |
| <b>N2-C2</b>   | 1.470(2)        | 1.46            |
| <b>N2-C13</b>  | 1.268(2)        | 1.27            |
| <b>N3-C8</b>   | 1.349(2)        | 1.35            |
| <b>N3-C12</b>  | 1.340(2)        | 1.34            |
| <b>N4-C14</b>  | 1.344(2)        | 1.35            |
| <b>N4-C18</b>  | 1.341(2)        | 1.34            |
| <b>C1-C2</b>   | 1.528(2)        | 1.55            |
| <b>C1-C6</b>   | 1.529(2)        | 1.54            |
| <b>C2-C3</b>   | 1.529(2)        | 1.54            |
| <b>C3-C4</b>   | 1.531(2)        | 1.54            |
| <b>C4-C5</b>   | 1.523(2)        | 1.54            |
| <b>C5-C6</b>   | 1.532(2)        | 1.54            |
| <b>C7-C8</b>   | 1.482(2)        | 1.48            |
| <b>C8-C9</b>   | 1.389(2)        | 1.40            |
| <b>C9-C10</b>  | 1.389(2)        | 1.39            |
| <b>C10-C11</b> | 1.391(2)        | 1.40            |
| <b>C11-C12</b> | 1.381(2)        | 1.40            |
| <b>C13-C14</b> | 1.482(2)        | 1.48            |
| <b>C14-C15</b> | 1.388(2)        | 1.40            |
| <b>C15-C16</b> | 1.385(3)        | 1.39            |
| <b>C16-C17</b> | 1.390(3)        | 1.40            |

|                |          |      |
|----------------|----------|------|
| <b>C17-C18</b> | 1.380(2) | 1.40 |
|----------------|----------|------|

**Table 5.** Experimental and calculated (B3LYP-D) bond angles for 2-py-BPID.

| <b>Bond Angle</b>  | <b>Expt (°)</b> | <b>Calc (°)</b> |
|--------------------|-----------------|-----------------|
| <b>C1-N1-C7</b>    | 117.9(1)        | 118             |
| <b>C2-N2-C13</b>   | 116.6(1)        | 118             |
| <b>C8-N3-C12</b>   | 116.6(1)        | 118             |
| <b>C14-N4-C18</b>  | 117.0(2)        | 118             |
| <b>N1-C1-C2</b>    | 108.8(1)        | 109             |
| <b>N1-C1-C6</b>    | 108.7(1)        | 110             |
| <b>C2-C1-C6</b>    | 110.6(1)        | 110             |
| <b>N2-C2-C1</b>    | 109.6(1)        | 109             |
| <b>N2-C2-C3</b>    | 108.7(1)        | 110             |
| <b>C1-C2-C3</b>    | 110.8(1)        | 110             |
| <b>C2-C3-C4</b>    | 111.0(1)        | 112             |
| <b>C3-C4-C5</b>    | 110.4(1)        | 111             |
| <b>C4-C5-C6</b>    | 110.1(1)        | 111             |
| <b>C1-C6-C5</b>    | 111.6(1)        | 111             |
| <b>N1-C7-C8</b>    | 121.2(2)        | 123             |
| <b>N3-C8-C7</b>    | 115.3(1)        | 115             |
| <b>N3-C8-C9</b>    | 123.2(2)        | 123             |
| <b>C7-C8-C9</b>    | 121.5(2)        | 122             |
| <b>C8-C9-C10</b>   | 119.2(2)        | 119             |
| <b>C9-C10-C11</b>  | 118.0(2)        | 119             |
| <b>C10-C11-C12</b> | 118.8(2)        | 118             |
| <b>N3-C12-C11</b>  | 124.2(2)        | 123             |



|                    |          |     |
|--------------------|----------|-----|
| <b>N2-C13-C14</b>  | 122.5(2) | 123 |
| <b>N4-C14-C13</b>  | 114.2(1) | 115 |
| <b>N4-C14-C15</b>  | 123.1(2) | 123 |
| <b>C13-C14-C15</b> | 122.7(1) | 122 |
| <b>C14-C15-C16</b> | 119.0(2) | 119 |
| <b>C15-C16-C17</b> | 118.4(2) | 119 |
| <b>C16-C17-C18</b> | 118.6(2) | 118 |
| <b>N4-C18-C17</b>  | 123.8(2) | 123 |

**Table 6.** Experimental and calculated bond lengths for K<sub>2</sub>[2-py-BPID\*].

|               | Expt (Å)  | B3LYP | B3LYP w/ THF | B3LYP-D w/ THF | wB97X-D w/ THF |
|---------------|-----------|-------|--------------|----------------|----------------|
| <b>K1-N1</b>  | 2.9439(4) | 2.83  | 2.86         | 2.90           | 2.87           |
| <b>K1-N2</b>  | 2.8196(4) | 2.77  | 2.80         | 2.84           | 2.78           |
| <b>K1-N3</b>  | 2.7903(4) | 2.81  | 2.83         | 2.85           | 2.77           |
| <b>K1-N4</b>  | 2.9400(5) | 2.82  | 2.87         | 2.89           | 2.83           |
| <b>K2-N1</b>  | 2.9563(4) | 2.89  | 2.93         | 2.96           | 2.91           |
| <b>K2-N2</b>  | 2.7654(4) | 2.75  | 2.77         | 2.79           | 2.76           |
| <b>K2-N3</b>  | 2.7571(4) | 2.69  | 2.72         | 2.76           | 2.72           |
| <b>K2-N4</b>  | 2.9692(4) | 2.88  | 2.90         | 2.92           | 2.87           |
| <b>N1-C1</b>  | 1.3481(3) | 1.35  | 1.35         | 1.35           | 1.34           |
| <b>N1-C5</b>  | 1.3907(2) | 1.39  | 1.39         | 1.39           | 1.38           |
| <b>N2-C6</b>  | 1.3551(3) | 1.35  | 1.35         | 1.35           | 1.36           |
| <b>N2-C7</b>  | 1.3205(3) | 1.32  | 1.32         | 1.32           | 1.31           |
| <b>N3-C12</b> | 1.3261(2) | 1.32  | 1.32         | 1.32           | 1.31           |
| <b>N3-C13</b> | 1.3556(3) | 1.35  | 1.35         | 1.35           | 1.36           |
| <b>N4-C14</b> | 1.3847(2) | 1.39  | 1.39         | 1.39           | 1.38           |
| <b>N4-C18</b> | 1.3432(2) | 1.35  | 1.35         | 1.35           | 1.34           |
| <b>C1-C2</b>  | 1.3804(3) | 1.39  | 1.39         | 1.39           | 1.38           |
| <b>C2-C3</b>  | 1.3995(2) | 1.42  | 1.42         | 1.42           | 1.41           |
| <b>C3-C4</b>  | 1.3582(3) | 1.37  | 1.38         | 1.38           | 1.37           |
| <b>C4-C5</b>  | 1.4212(3) | 1.44  | 1.44         | 1.44           | 1.44           |

|                |           |      |      |      |      |
|----------------|-----------|------|------|------|------|
| <b>C5-C6</b>   | 1.3918(3) | 1.42 | 1.42 | 1.42 | 1.41 |
| <b>C7-C8</b>   | 1.4977(3) | 1.51 | 1.52 | 1.51 | 1.51 |
| <b>C7-C12</b>  | 1.4487(3) | 1.46 | 1.46 | 1.46 | 1.47 |
| <b>C8-C9</b>   | 1.5187(3) | 1.54 | 1.54 | 1.54 | 1.53 |
| <b>C9-C10</b>  | 1.5091(2) | 1.53 | 1.53 | 1.53 | 1.53 |
| <b>C10-C11</b> | 1.5143(2) | 1.54 | 1.54 | 1.54 | 1.53 |
| <b>C11-C12</b> | 1.4987(3) | 1.52 | 1.52 | 1.52 | 1.51 |
| <b>C13-C14</b> | 1.3938(3) | 1.42 | 1.42 | 1.42 | 1.41 |
| <b>C14-C15</b> | 1.4294(3) | 1.44 | 1.44 | 1.44 | 1.44 |
| <b>C15-C16</b> | 1.3575(3) | 1.37 | 1.38 | 1.38 | 1.37 |
| <b>C16-C17</b> | 1.4057(2) | 1.42 | 1.42 | 1.42 | 1.42 |
| <b>C17-C18</b> | 1.3716(3) | 1.39 | 1.39 | 1.39 | 1.38 |

**Table 7.** Experimental and calculated bond angles for  $K_2[2\text{-py-BPID}^*]$ .

|                 | <b>Expt (°)</b> | <b>B3LYP</b> | <b>B3LYP w/ THF</b> | <b>B3LYP-D w/ THF</b> | <b>wB97X-D w/ THF</b> |
|-----------------|-----------------|--------------|---------------------|-----------------------|-----------------------|
| <b>N1-K1-N2</b> | 57.3            | 60           | 59                  | 58                    | 59                    |
| <b>N1-K1-N3</b> | 100.9           | 102          | 102                 | 101                   | 102                   |
| <b>N1-K1-N4</b> | 101.7           | 100          | 100                 | 99                    | 99                    |
| <b>N2-K1-N3</b> | 56.2            | 56           | 56                  | 56                    | 57                    |
| <b>N2-K1-N4</b> | 101.2           | 103          | 102                 | 101                   | 102                   |
| <b>N3-K1-N4</b> | 57.5            | 59           | 59                  | 58                    | 59                    |
| <b>N1-K2-N2</b> | 57.7            | 59           | 59                  | 58                    | 58                    |
| <b>N1-K2-N3</b> | 101.4           | 103          | 102                 | 101                   | 102                   |
| <b>N1-K2-N4</b> | 100.7           | 97           | 97                  | 97                    | 97                    |
| <b>N2-K2-N3</b> | 57.2            | 58           | 58                  | 57                    | 58                    |
| <b>N2-K2-N4</b> | 101.8           | 102          | 102                 | 101                   | 102                   |
| <b>N3-K2-N4</b> | 57.4            | 60           | 60                  | 59                    | 59                    |
| <b>K1-N1-K2</b> | 69.8            | 70           | 70                  | 71                    | 71                    |
| <b>K1-N1-C1</b> | 124.6           | 122          | 121                 | 120                   | 121                   |
| <b>K1-N1-C5</b> | 108.5           | 102          | 103                 | 103                   | 104                   |
| <b>K2-N1-C1</b> | 123.2           | 125          | 126                 | 126                   | 125                   |
| <b>K2-N1-C5</b> | 103.4           | 109          | 108                 | 108                   | 108                   |
| <b>C1-N1-C5</b> | 117.4           | 118          | 118                 | 118                   | 118                   |
| <b>K1-N2-K2</b> | 74.3            | 73           | 74                  | 75                    | 74                    |
| <b>K1-N2-C6</b> | 113.4           | 105          | 106                 | 107                   | 108                   |

|                   |       |     |     |     |     |
|-------------------|-------|-----|-----|-----|-----|
| <b>K1-N2-C7</b>   | 112.3 | 114 | 113 | 113 | 111 |
| <b>K2-N2-C6</b>   | 109.6 | 114 | 114 | 113 | 114 |
| <b>K2-N2-C7</b>   | 108.8 | 109 | 109 | 109 | 109 |
| <b>C6-N2-C7</b>   | 126.2 | 128 | 128 | 128 | 128 |
| <b>K1-N3-K2</b>   | 74.9  | 73  | 74  | 75  | 75  |
| <b>K1-N3-C12</b>  | 111.1 | 113 | 113 | 113 | 112 |
| <b>K1-N3-C13</b>  | 111.2 | 113 | 112 | 112 | 112 |
| <b>K2-N3-C12</b>  | 110.6 | 110 | 110 | 109 | 110 |
| <b>K2-N3-C13</b>  | 112.7 | 106 | 107 | 107 | 108 |
| <b>C12-N3-C13</b> | 125.3 | 128 | 128 | 127 | 128 |
| <b>K1-N4-K2</b>   | 69.7  | 71  | 71  | 72  | 72  |
| <b>K1-N4-C14</b>  | 106.0 | 111 | 110 | 110 | 109 |
| <b>K1-N4-C18</b>  | 123.2 | 122 | 122 | 122 | 123 |
| <b>K2-N4-C14</b>  | 105.4 | 100 | 101 | 102 | 102 |
| <b>K2-N4-C18</b>  | 126.2 | 125 | 125 | 124 | 123 |
| <b>C14-N4-C18</b> | 116.8 | 118 | 118 | 118 | 118 |
| <b>N1-C1-C2</b>   | 124.8 | 125 | 125 | 125 | 125 |
| <b>C1-C2-C3</b>   | 117.7 | 117 | 117 | 117 | 117 |
| <b>C2-C3-C4</b>   | 119.6 | 120 | 120 | 120 | 120 |
| <b>C3-C4-C5</b>   | 120.9 | 121 | 121 | 121 | 121 |
| <b>N1-C5-C4</b>   | 119.6 | 119 | 119 | 119 | 119 |
| <b>N1-C5-C6</b>   | 120.1 | 120 | 120 | 120 | 120 |
| <b>C4-C5-C6</b>   | 120.4 | 121 | 121 | 121 | 121 |
| <b>N2-C6-C5</b>   | 119.9 | 120 | 120 | 120 | 119 |
| <b>N2-C7-C8</b>   | 122.5 | 123 | 123 | 123 | 123 |

|                    |       |     |     |     |     |
|--------------------|-------|-----|-----|-----|-----|
| <b>N2-C7-C12</b>   | 116.6 | 116 | 117 | 117 | 117 |
| <b>C8-C7-C12</b>   | 120.9 | 121 | 121 | 121 | 121 |
| <b>C7-C8-C9</b>    | 113.5 | 113 | 113 | 113 | 113 |
| <b>C8-C9-C10</b>   | 110.6 | 111 | 111 | 111 | 111 |
| <b>C9-C10-C11</b>  | 110.8 | 111 | 111 | 111 | 111 |
| <b>C10-C11-C12</b> | 113.1 | 114 | 114 | 114 | 113 |
| <b>N3-C12-C7</b>   | 116.9 | 116 | 117 | 117 | 117 |
| <b>N3-C12-C11</b>  | 122.0 | 123 | 123 | 122 | 123 |
| <b>C7-C12-C11</b>  | 121.1 | 121 | 121 | 121 | 121 |
| <b>N3-C13-C14</b>  | 119.6 | 120 | 120 | 120 | 119 |
| <b>N4-C14-C13</b>  | 120.1 | 120 | 120 | 120 | 120 |
| <b>N4-C14-C15</b>  | 119.6 | 119 | 119 | 119 | 119 |
| <b>C13-C14-C15</b> | 120.2 | 121 | 121 | 121 | 121 |
| <b>C14-C15-C16</b> | 121.0 | 121 | 121 | 121 | 121 |
| <b>C15-C16-C17</b> | 119.0 | 120 | 120 | 120 | 120 |
| <b>C16-C17-C18</b> | 117.6 | 117 | 117 | 117 | 117 |
| <b>N4-C18-C17</b>  | 125.8 | 126 | 125 | 125 | 125 |

**Table 8.** Final coordinates for 2-py-BPID.

COORDINATES OF ALL ATOMS ARE (ANGS)

| ATOM | CHARGE | X             | Y             | Z             |
|------|--------|---------------|---------------|---------------|
| N    | 7.0    | 3.6812018936  | 6.1543652820  | 0.8670991906  |
| N    | 7.0    | 1.9103903977  | 3.9528224125  | 1.4046471703  |
| N    | 7.0    | 4.8812793933  | 7.6080705724  | 3.9039772049  |
| N    | 7.0    | -0.9029810504 | 5.1014615404  | 3.2880678256  |
| C    | 6.0    | 3.8347672344  | 4.8664593044  | 0.2051082145  |
| H    | 1.0    | 4.4716682085  | 4.1856416560  | 0.7966211209  |
| C    | 6.0    | 2.4410138351  | 4.1990582301  | 0.0709630792  |
| H    | 1.0    | 1.7956276912  | 4.8924882018  | -0.4960901383 |
| C    | 6.0    | 2.5541702183  | 2.8708236326  | -0.6986102670 |
| H    | 1.0    | 1.5540018777  | 2.4326641982  | -0.7976888323 |
| H    | 1.0    | 3.1530573118  | 2.1711902900  | -0.0999579115 |
| C    | 6.0    | 3.2024950760  | 3.0662023452  | -2.0769342070 |
| H    | 1.0    | 3.2961104521  | 2.0977440554  | -2.5825923328 |
| H    | 1.0    | 2.5493005997  | 3.6894780131  | -2.7042320460 |
| C    | 6.0    | 4.5766913119  | 3.7400949126  | -1.9486125557 |
| H    | 1.0    | 5.0114980998  | 3.9171811637  | -2.9395873123 |
| H    | 1.0    | 5.2627831420  | 3.0657379715  | -1.4164811750 |
| C    | 6.0    | 4.4695156695  | 5.0664356516  | -1.1831249261 |
| H    | 1.0    | 5.4570732742  | 5.5256642953  | -1.0565417861 |
| H    | 1.0    | 3.8547994270  | 5.7784694664  | -1.7505852029 |
| C    | 6.0    | 4.2693492622  | 6.3273169051  | 1.9846618452  |
| H    | 1.0    | 4.8933632794  | 5.5535171176  | 2.4544447656  |
| C    | 6.0    | 4.1625935779  | 7.5817040135  | 2.7629228569  |
| C    | 6.0    | 3.3611134282  | 8.6566349562  | 2.3461569911  |
| H    | 1.0    | 2.8001510044  | 8.5741077871  | 1.4218577870  |
| C    | 6.0    | 3.3072898972  | 9.7993919044  | 3.1409542667  |
| H    | 1.0    | 2.6936131698  | 10.6457209727 | 2.8461496368  |
| C    | 6.0    | 4.0526594477  | 9.8338783671  | 4.3235224853  |
| H    | 1.0    | 4.0398972235  | 10.7018175963 | 4.9753715204  |
| C    | 6.0    | 4.8204783067  | 8.7148215664  | 4.6580017026  |
| H    | 1.0    | 5.4111128791  | 8.7060425118  | 5.5716597479  |

|   |     |               |              |              |
|---|-----|---------------|--------------|--------------|
| C | 6.0 | 0.8492483876  | 4.5667074210 | 1.7537108790 |
| H | 1.0 | 0.3092789350  | 5.2501181817 | 1.0828455699 |
| C | 6.0 | 0.2489853750  | 4.4258594487 | 3.0996294320 |
| C | 6.0 | 0.8499858329  | 3.6548804094 | 4.1074308951 |
| H | 1.0 | 1.7828332866  | 3.1426640413 | 3.8990727700 |
| C | 6.0 | 0.2291574141  | 3.5768812489 | 5.3514250220 |
| H | 1.0 | 0.6707127522  | 2.9905836907 | 6.1521071191 |
| C | 6.0 | -0.9691231691 | 4.2700624853 | 5.5515188488 |
| H | 1.0 | -1.4877055102 | 4.2402433325 | 6.5045580785 |
| C | 6.0 | -1.4899737181 | 5.0164185602 | 4.4905837290 |
| H | 1.0 | -2.4169287230 | 5.5728773228 | 4.6107626124 |



**Table 9.** Final B3LYP-D coordinates for K<sub>2</sub>[2-py-BPID\*].

COORDINATES OF ALL ATOMS ARE (ANGS)

| ATOM | CHARGE | X             | Y             | Z             |
|------|--------|---------------|---------------|---------------|
| K    | 19.0   | -0.8457100000 | 4.9898500000  | 9.1004900000  |
| K    | 19.0   | -4.1770600000 | 4.8832100000  | 9.3414500000  |
| N    | 7.0    | -2.6604600000 | 5.9718400000  | 7.1038100000  |
| N    | 7.0    | -2.5784800000 | 3.2861100000  | 7.7600000000  |
| N    | 7.0    | -2.4131400000 | 3.1020200000  | 10.3913700000 |
| N    | 7.0    | -2.3446200000 | 5.6727100000  | 11.4077600000 |
| C    | 6.0    | -2.6487900000 | 7.2655700000  | 6.7397400000  |
| H    | 1.0    | -2.6916300000 | 7.9793900000  | 7.5631300000  |
| C    | 6.0    | -2.5879000000 | 7.7307600000  | 5.4388300000  |
| H    | 1.0    | -2.5776300000 | 8.7931400000  | 5.2242600000  |
| C    | 6.0    | -2.5375800000 | 6.7575400000  | 4.4135000000  |
| H    | 1.0    | -2.4892400000 | 7.0615600000  | 3.3709600000  |
| C    | 6.0    | -2.5546400000 | 5.4263900000  | 4.7393300000  |
| H    | 1.0    | -2.5159500000 | 4.6646900000  | 3.9651600000  |
| C    | 6.0    | -2.6043800000 | 5.0112600000  | 6.1127100000  |
| C    | 6.0    | -2.5828000000 | 3.6394000000  | 6.4498200000  |
| H    | 1.0    | -2.5223300000 | 2.9073100000  | 5.6420300000  |
| C    | 6.0    | -2.5358600000 | 2.0805500000  | 8.2619300000  |
| C    | 6.0    | -2.5457800000 | 0.8375200000  | 7.4034100000  |
| H    | 1.0    | -1.5527200000 | 0.7077200000  | 6.9425900000  |
| H    | 1.0    | -3.2438600000 | 0.9840300000  | 6.5680400000  |
| C    | 6.0    | -2.9152300000 | -0.4302800000 | 8.1773800000  |
| H    | 1.0    | -3.9854700000 | -0.4108500000 | 8.4251300000  |
| H    | 1.0    | -2.7509400000 | -1.3111000000 | 7.5470500000  |
| C    | 6.0    | -2.1073000000 | -0.5292500000 | 9.4689100000  |
| H    | 1.0    | -1.0366000000 | -0.5022100000 | 9.2245700000  |
| H    | 1.0    | -2.2948500000 | -1.4839000000 | 9.9721000000  |
| C    | 6.0    | -2.4478100000 | 0.6292100000  | 10.4100000000 |
| H    | 1.0    | -3.4381100000 | 0.4543200000  | 10.8617200000 |
| H    | 1.0    | -1.7404100000 | 0.6529200000  | 11.2497800000 |
| C    | 6.0    | -2.4511100000 | 1.9772700000  | 9.7286300000  |

|   |     |               |              |               |
|---|-----|---------------|--------------|---------------|
| C | 6.0 | -2.4079400000 | 3.2734500000 | 11.7391200000 |
| H | 1.0 | -2.4521200000 | 2.4373400000 | 12.4397400000 |
| C | 6.0 | -2.3812000000 | 4.5854100000 | 12.2606400000 |
| C | 6.0 | -2.3956000000 | 4.8122400000 | 13.6789900000 |
| H | 1.0 | -2.4267000000 | 3.9532500000 | 14.3438100000 |
| C | 6.0 | -2.3804600000 | 6.0868900000 | 14.1816800000 |
| H | 1.0 | -2.3968500000 | 6.2479300000 | 15.2566200000 |
| C | 6.0 | -2.3355600000 | 7.1902000000 | 13.2965400000 |
| H | 1.0 | -2.3210800000 | 8.2140200000 | 13.6520700000 |
| C | 6.0 | -2.3257800000 | 6.9052900000 | 11.9434900000 |
| H | 1.0 | -2.2984200000 | 7.7225000000 | 11.2219200000 |

**Table 10.** Final coordinates for KN(SiMe<sub>3</sub>)<sub>2</sub>.

COORDINATES OF ALL ATOMS ARE (ANGS)

| ATOM | CHARGE | X             | Y             | Z             |
|------|--------|---------------|---------------|---------------|
| N    | 7.0    | 0.3120032936  | -0.1612533094 | 0.5080868484  |
| SI   | 14.0   | 1.3435342378  | -0.4319917185 | -0.8212582016 |
| SI   | 14.0   | 0.4232087390  | 1.1532715014  | 1.5879931667  |
| C    | 6.0    | 2.1834780063  | 1.4781710119  | 2.2690268040  |
| C    | 6.0    | -0.1657188018 | 2.8224462411  | 0.8703099744  |
| C    | 6.0    | -0.6617465230 | 0.8511875635  | 3.1413061949  |
| C    | 6.0    | 2.9962624338  | -1.2913695254 | -0.3480523887 |
| C    | 6.0    | 0.5285405221  | -1.5986439060 | -2.0944435130 |
| C    | 6.0    | 1.8586280362  | 1.1328328353  | -1.7906600796 |
| H    | 1.0    | 2.1859141574  | 2.2918254233  | 3.0069022702  |
| H    | 1.0    | 2.8782452788  | 1.7513702603  | 1.4648310667  |
| H    | 1.0    | 2.5829324375  | 0.5782575036  | 2.7556151074  |
| H    | 1.0    | -1.2164297454 | 2.7637819302  | 0.5577989402  |
| H    | 1.0    | 0.4294070498  | 3.0801657928  | -0.0136602640 |
| H    | 1.0    | -0.0692992575 | 3.6361442087  | 1.6011420826  |
| H    | 1.0    | -0.6955899053 | 1.7605737160  | 3.7552210459  |
| H    | 1.0    | -0.2803740408 | 0.0531313927  | 3.7965410585  |
| H    | 1.0    | -1.6952736035 | 0.6009151524  | 2.8671706472  |
| H    | 1.0    | 3.5049194621  | -0.7317442234 | 0.4468382489  |
| H    | 1.0    | 3.6702769161  | -1.3441996286 | -1.2136984608 |
| H    | 1.0    | 2.8546588917  | -2.3221559679 | 0.0094799694  |
| H    | 1.0    | 0.2216074564  | -2.5504873068 | -1.6389840093 |
| H    | 1.0    | 1.2207383707  | -1.8329698457 | -2.9136562579 |
| H    | 1.0    | -0.3670923202 | -1.1382663946 | -2.5304920355 |
| H    | 1.0    | 2.4169958805  | 1.8279170700  | -1.1511262022 |
| H    | 1.0    | 0.9736783703  | 1.6637552118  | -2.1633445974 |
| H    | 1.0    | 2.4925288491  | 0.8804241490  | -2.6508702746 |
| K    | 19.0   | 0.0365320914  | -2.3486534406 | 1.8865811940  |

**Table 11.** Final coordinates for HN(SiMe<sub>3</sub>)<sub>2</sub>.

COORDINATES OF ALL ATOMS ARE (ANGS)

| ATOM | CHARGE | X             | Y             | Z             |
|------|--------|---------------|---------------|---------------|
| N    | 7.0    | 0.2871189535  | -0.0295660852 | 0.4114076192  |
| SI   | 14.0   | 1.3496934732  | -0.4349029511 | -0.9271483532 |
| SI   | 14.0   | 0.3666056161  | 1.2655361893  | 1.5972012515  |
| C    | 6.0    | 2.1100243056  | 1.3976709214  | 2.3250277740  |
| C    | 6.0    | -0.0731155810 | 2.9349087610  | 0.8218718990  |
| C    | 6.0    | -0.8792871545 | 0.8633908055  | 2.9594827235  |
| C    | 6.0    | 2.8182925930  | -1.4814002679 | -0.3511576154 |
| C    | 6.0    | 0.3401920885  | -1.4055667953 | -2.1962034233 |
| C    | 6.0    | 2.0071733307  | 1.1623531368  | -1.6952467273 |
| H    | 1.0    | -0.4113584766 | -0.7356465657 | 0.6253116565  |
| H    | 1.0    | 2.1599052083  | 2.2071561180  | 3.0638791926  |
| H    | 1.0    | 2.8511618435  | 1.6133540540  | 1.5462573787  |
| H    | 1.0    | 2.4011913801  | 0.4635129453  | 2.8192721718  |
| H    | 1.0    | -1.0841578215 | 2.9116848010  | 0.3981721571  |
| H    | 1.0    | 0.6232397946  | 3.1976680216  | 0.0180426875  |
| H    | 1.0    | -0.0361668509 | 3.7318639252  | 1.5753390959  |
| H    | 1.0    | -0.9039304380 | 1.6672745057  | 3.7050076741  |
| H    | 1.0    | -0.6177984751 | -0.0678479712 | 3.4759328701  |
| H    | 1.0    | -1.8911609568 | 0.7565002062  | 2.5498463878  |
| H    | 1.0    | 3.3936170352  | -0.9432867037 | 0.4116476795  |
| H    | 1.0    | 3.4921413525  | -1.7215198669 | -1.1831007748 |
| H    | 1.0    | 2.4733211644  | -2.4239712201 | 0.0909473330  |
| H    | 1.0    | -0.0503212161 | -2.3335116521 | -1.7603535080 |
| H    | 1.0    | 0.9549053042  | -1.6754686056 | -3.0632515355 |
| H    | 1.0    | -0.5104856052 | -0.8108650275 | -2.5481753411 |
| H    | 1.0    | 2.5696088623  | 1.7636058369  | -0.9717344443 |
| H    | 1.0    | 1.1851051931  | 1.7767523405  | -2.0793770051 |
| H    | 1.0    | 2.6807327350  | 0.9304799684  | -2.5289550634 |

**Table 12.** Final coordinates for KH.

COORDINATES OF ALL ATOMS ARE (ANGS)

| ATOM | CHARGE | X             | Y            | Z            |
|------|--------|---------------|--------------|--------------|
| K    | 19.0   | -0.3696400000 | 0.1846748160 | 0.0000000000 |
| H    | 1.0    | -0.3696400000 | 2.5503851840 | 0.0000000000 |

**Table 13.** Final coordinates for H<sub>2</sub>.

COORDINATES OF ALL ATOMS ARE (ANGS)

| ATOM | CHARGE | X            | Y            | Z            |
|------|--------|--------------|--------------|--------------|
| H    | 1.0    | 0.0000000000 | 0.0000000000 | 0.0777755782 |
| H    | 1.0    | 0.0000000000 | 0.0000000000 | 0.8222244218 |

- 
- <sup>3</sup> J. Tomasi, B. Mennucci, R. Cammi, *Chem. Rev.*, 2005, **105**, 2999-3093.  
<sup>4</sup> P. J. Stephens, F. J. Devlin, C. F. Chablowski, M. J. Frisch, *J. Phys. Chem.*, 1994, **98**, 11623-11627.  
<sup>5</sup> R. H. Hertwig, W. Koch, *Chem. Phys. Lett.*, 1997, **268**, 345-351.  
<sup>6</sup> R. Peverati, K. K. Baldridge, *J. Chem. Theory Comput.*, 2008, **4**, 2030-2048.  
<sup>7</sup> S. Grimme, J. Antony, S. Ehrlich, H. Krieg, *J. Chem. Phys.*, 2010, **132**, 154104.  
<sup>8</sup> J. -D. Chai, M. Head-Gordon, *Phys. Chem. Chem. Phys.*, 2008, **10**, 6615-6620.  
<sup>9</sup> S. Grimme, *J. Comput. Chem.*, 2006, **27**, 1787-1799.  
<sup>10</sup> R. Ditchfield, W. J. Hehre, J. A. Pople, *J. Chem. Phys.*, 1971, **54**, 724-728.  
<sup>11</sup> W. J. Hehre, R. Ditchfield, J. A. Pople, *J. Chem. Phys.*, 1972, **56**, 2257-2261.  
<sup>12</sup> V. A. Rassolov, M. A. Ratner, J. A. Pople, R. C. Redfern, L. A. Curtiss, *J. Comput. Chem.*, 2001, **22**, 976-984.  
<sup>13</sup> Y. Zhao, D. G. Truhlar, *Theoret. Chem. Acc.*, 2008, **120**, 215-241.  
<sup>14</sup> A. Schaefer, H. Horn, R. Ahlrichs, *J. Chem. Phys.*, 1992, **97**, 2571.  
<sup>15</sup> A. Schaefer, C. Huber, R. Ahlrichs, *J. Chem. Phys.*, 1994, **100**, 5829.  
<sup>16</sup> A. J. H. Wachters, *J. Chem. Phys.*, 1970, **55**, 716-723.  
<sup>17</sup> M. W. Schmidt, K. K. Baldridge, J. A. Boatz, S. T. Elbert, M. S. Gordon, J. J. Jensen, S. Koseki, N. Matsunaga, K. A. Nguyen, S. Su, T. L. Windus, M. Dupuis, J. A. Montgomery, *J. Comput. Chem.*, 1993, **14**, 1347-1363.

---

<sup>18</sup> B. M. Bode, M. S. Gordon, *J. Mol Graphics Mod.*, 1998, **16**, 133-138.
